# Supplementary material
Source: PubMed Central journal article supplement (PMC5118964)
Supplement: Supp_Data.pdf [file Supp_Data.pdf]

## Supplementary Data

### Xerostomia Questionnaire

1. Rate the difficulty you experience in speaking due to dryness of your mouth and tongue. (Easy → Extremely difficult)
2. Rate the difficulty you experience in chewing food due to dryness. (Easy → Extremely difficult)
3. Rate the difficulty you experience in swallowing food due to dryness. (Easy → Extremely difficult)
4. Rate the dryness your mouth feels when eating a meal. (No dryness → Extreme dryness)
5. Rate the dryness in your mouth while not eating or chewing. (No dryness → Extreme dryness)
6. Rate the frequency of sipping liquids to aid in the swallowing of food. (None required → Extremely frequent)
7. Rate the frequency of fluid intake required for oral comfort when not eating. (None required → Extremely frequent)
8. Rate the frequency of sleeping problems due to dryness. (None → Extremely frequent)

### Telephone Survey Questions

(Questions 3–10 are on a point scale of 1–10, with 1 being an unfavorable outcome to 10 being the most favorable outcome).

1. How are you doing overall after the Sialendoscopy procedure in relation to your salivary production?
2. Do you feel that the procedure helped you? Yes/No
3. Rate the difficulty you experience in speaking due to dryness of your mouth and tongue. (Easy → Extremely difficult)
4. Rate the difficulty you experience in chewing food due to dryness. (Easy → Extremely difficult)
5. Rate the difficulty you experience in swallowing food due to dryness. (Easy → Extremely difficult)
6. Rate the dryness your mouth feels when eating a meal. (No dryness → Extreme dryness)
7. Rate the dryness in your mouth while not eating or chewing. (No dryness → Extreme dryness)
8. Rate the frequency of sipping liquids to aid in the swallowing of food. (None required → Extremely frequent)
9. Rate the frequency of fluid intake required for oral comfort when not eating. (None required → Extremely frequent)
10. Rate the frequency of sleeping problems due to dryness. (None → Extremely frequent)
11. What would you rate your overall percentage of improvement following the sialendoscopy procedure? (Negative / 0–100%)
