# Supplementary material
Source: PubMed Central journal article supplement (PMC5118964)
Supplement: Supp_Figure1.pdf [file Supp_Figure1.pdf]

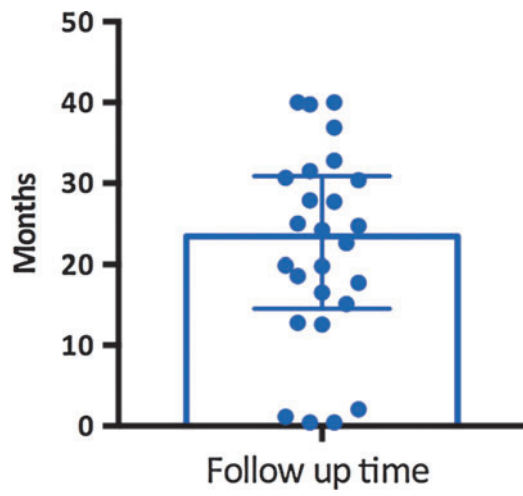

**SUPPLEMENTARY FIG. S1.** Follow-up time for patients after sialendoscopy. Patients were seen in the clinic or contacted by telephone after sialendoscopy to assess symptoms.
