# Supplementary material
Source: PubMed Central journal article supplement (PMC5118964)
Supplement: Supp_Figure2.pdf [file Supp_Figure2.pdf]

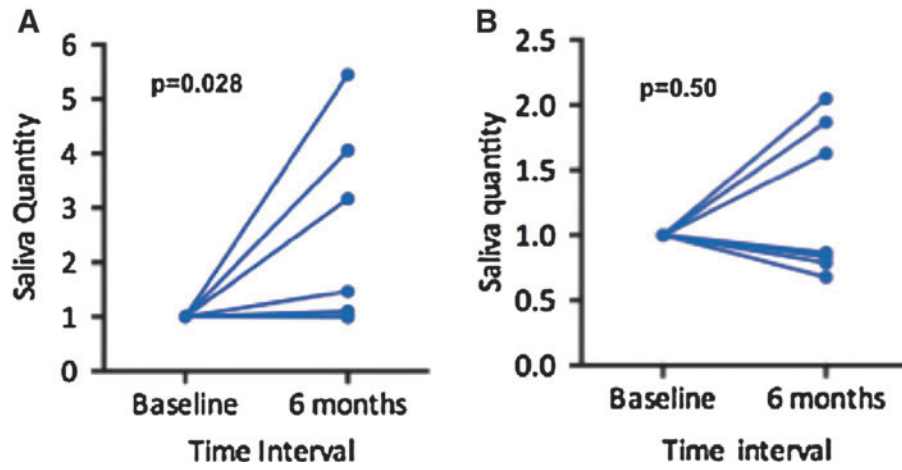

**SUPPLEMENTARY FIG. S2.** Quantitative assessment of saliva production following sialendoscopy. Changes found to be significant in the unstimulated group (A) and not significant in the stimulated group (B) as measured by sialometry prior to sialendoscopy (Baseline) and after treatment (6 months).
